# Supplementary material for: Use of Landsat Satellite Images in the Assessment of the Variability in Ice Cover on Polish Lakes
Source: MDPI journal article supplement (doi:10.3390/rs15123030), 2023-06-09
Supplement: s1 [file s1]

**Table S1.** Morphometric parameters of the studied lakes.

| No | Lake               | Area<br>[ha] | Alt<br>masl | Vol<br>[mln m <sup>3</sup> ] | MeanD<br>[m] | MaxG<br>[m] | MaxL<br>[m] | MaxW<br>[m] | EffL   | ShorL<br>[m] | ShorD | ExpI  |
|----|--------------------|--------------|-------------|------------------------------|--------------|-------------|-------------|-------------|--------|--------------|-------|-------|
| 1  | Będargowo          | 28.3         | 96          | 0.8                          | 2.9          | 5.9         | 1070        | 395         | 732.5  | 2500         | 1.33  | 9.8   |
| 2  | Brody              | 66.6         | 130         | 6.1                          | 9.2          | 22.7        | 1790        | 590         | 1190   | 5250         | 1.82  | 7.2   |
| 3  | Brzeźno            | 19.6         | 88          | 0.4                          | 2.5          | 5.3         | 1000        | 315         | 657.5  | 3020         | 1.92  | 7.8   |
| 4  | Jez. Brzeźno       | 92.5         | 73          | 1.8                          | 2            | 4.7         | 1950        | 780         | 1365   | 5940         | 1.74  | 46.2  |
| 5  | Chociebądz Wielki  | 47.5         | 118         | 0.9                          | 1.9          | 5.7         | 2300        | 380         | 1340   | 5700         | 2.34  | 25    |
| 6  | Czaple Duże        | 103.2        | 97.4        | 6.7                          | 6.5          | 25.7        | 3360        | 610         | 1985   | 850          | 2.36  | 15.6  |
| 7  | Czaplino           | 108.3        | 133         | 13.3                         | 12.3         | 22.9        | 1840        | 880         | 1360   | 5270         | 1.43  | 8.8   |
| 8  | Darskowo           | 36.9         | 116.3       | 3.1                          | 8.5          | 18.5        | 1150        | 440         | 795    | 2825         | 1.31  | 4.3   |
| 9  | Dębno              | 61.1         | 114         | 2.4                          | 4            | 7.5         | 2040        | 425         | 1232.5 | 5300         | 1.91  | 15.3  |
| 10 | Dębno              | 68           | 140         | 2.7                          | 4.1          | 14.9        | 1800        | 650         | 1225   | 5000         | 1.71  | 16.6  |
| 11 | Dłusko             | 22.9         | 130         | 0.5                          | 2.4          | 3.5         | 1250        | 220         | 735    | 3100         | 1.82  | 12.8  |
| 12 | Dołgie             | 54.7         | 106         | 3.7                          | 6.8          | 27.3        | 2300        | 450         | 1375   | 5200         | 1.98  | 9.4   |
| 13 | Dołgie Wielkie     | 44.4         | 136         | 2.2                          | 5.1          | 10.2        | 2285        | 370         | 1327.5 | 5850         | 2.48  | 8.7   |
| 14 | Drawsko            | 1871         | 128         | 331                          | 17.7         | 82.2        | 12610       | 3900        | 8255   | 74350        | 4.97  | 95.8  |
| 15 | Dzicze             | 14.5         | 141         | 0.2                          | 1.4          | 2.8         | 630         | 340         | 485    | 1550         | 1.15  | 10.4  |
| 16 | Gęgnowskie         | 61.2         | 96          | 0.93                         | 1.5          | 3.9         | 2130        | 535         | 1332.5 | 7320         | 2.63  | 32.5  |
| 17 | Jeziorki           | 27.5         | 139         | 0.8                          | 3.1          | 7.4         | 1190        | 500         | 845    | 3280         | 1.76  | 8.9   |
| 18 | Juchowo            | 32           | 143         | 0.8                          | 2.5          | 4.5         | 1400        | 360         | 880    | 3020         | 1.51  | 12.8  |
| 19 | Kamień             | 35.8         | 130         | 1.1                          | 3.3          | 10.7        | 1010        | 285         | 647.5  | 2410         | 1.41  | 3.9   |
| 20 | Kańsko             | 54.1         | 118         | 1.8                          | 3.4          | 5.4         | 1340        | 630         | 985    | 3920         | 1.51  | 15.9  |
| 21 | Kapka              | 7.2          | 128.9       | 0.3                          | 4.9          | 10.8        | 587         | 131         | 359    | 1350         | 1.41  | 1.5   |
| 22 | Kiełpino           | 28.6         | 155         | 0.4                          | 1.6          | 2.9         | 750         | 570         | 660    | 2300         | 1.21  | 17.9  |
| 23 | Kleszczno          | 33.7         | 128         | 0.15                         | 0.4          | 2.2         | 1120        | 590         | 855    | 3600         | 1.69  | 27.9  |
| 24 | Kłęckie            | 86.6         | 129         | 4.8                          | 5.6          | 13.8        | 2120        | 670         | 1395   | 6900         | 1.97  | 18.8  |
| 25 | Kłokowskie         | 24.4         | 134         | 2                            | 8.2          | 25.1        | 1105        | 340         | 722.5  | 2930         | 1.68  | 2.7   |
| 26 | Kolbackie Pd.      | 14.5         | 160         | 0.7                          | 1.8          | 4.1         | 850         | 250         | 550    | 2000         | 1.48  | 8     |
| 27 | Kolbackie Pn.      | 24.2         | 160         | 0.45                         | 1.9          | 4.8         | 1240        | 300         | 770    | 2900         | 1.66  | 12.7  |
| 28 | Komorze            | 416.7        | 131         | 49.3                         | 11.8         | 34.7        | 7550        | 1050        | 4300   | 24280        | 3.43  | 35.3  |
| 29 | Kopiel             | 14.6         | 141         | 0.2                          | 1.5          | 3.4         | 650         | 320         | 485    | 1700         | 1.26  | 9.7   |
| 30 | Krosino            | 177.2        | 123         | 12.7                         | 7.2          | 17.2        | 3575        | 690         | 2132.5 | 9570         | 2.03  | 24.6  |
| 31 | Lipno              | 31.2         | 137         | 1.4                          | 4.6          | 10.8        | 900         | 630         | 765    | 2712         | 1.36  | 6.8   |
| 32 | Lubicko Wielkie    | 170.7        | 130         | 11.6                         | 6.8          | 36.2        | 3180        | 1130        | 2155   | 15400        | 3.09  | 29.4  |
| 33 | Lubie              | 1439         | 95          | 169                          | 11.6         | 46.2        | 141000      | 2200        | 71600  | 44450        | 3.28  | 124.1 |
| 34 | Morzysław          | 14.4         | 130         | 0.3                          | 2.2          | 3.9         | 575         | 390         | 482.5  | 170          | 1.27  | 6.5   |
| 35 | Nątlino            | 19.1         | 133         | 0.46                         | 2.4          | 6.4         | 1085        | 195         | 640    | 3050         | 1.97  | 7.9   |
| 36 | Niecino            | 35.8         | 130         | 1.1                          | 3.3          | 10.7        | 1270        | 550         | 910    | 4850         | 2.31  | 7.2   |
| 37 | Okra               | 50.5         | 103         | 3.8                          | 7.5          | 21.8        | 1780        | 570         | 1175   | 3900         | 1.55  | 6.7   |
| 38 | Ostrowiec          | 75.1         | 120         | 1.3                          | 1.7          | 3           | 1760        | 850         | 1305   | 6700         | 2.15  | 44.2  |
| 39 | Piasiecznik Wielki | 45.4         | 133         | 2.9                          | 6.6          | 15          | 1480        | 580         | 1030   | 4300         | 1.8   | 6.9   |
| 40 | Prosino            | 61.2         | 137         | 0.6                          | 1.1          | 1.8         | 1350        | 600         | 975    | 3800         | 1.6   | 55.6  |
| 41 | Przytonko          | 109.7        | 121         | 0.4                          | 7.7          | 20.3        | 2600        | 600         | 1600   | 7075         | 1.91  | 14.2  |
| 42 | Radacz             | 157.1        | 138         | 8.1                          | 5.2          | 11          | 2185        | 1345        | 1765   | 6500         | 1.46  | 30.2  |
| 43 | Radacz Mały        | 10.3         | 139         | 0.16                         | 1.6          | 4.6         | 490         | 275         | 382.5  | 1250         | 1.1   | 6.4   |

|    |               |       |       |      |      |      |      |      |        |       |      |       |
|----|---------------|-------|-------|------|------|------|------|------|--------|-------|------|-------|
| 44 | Rakowo        | 18.1  | 130   | 1    | 5.9  | 12.2 | 1075 | 230  | 652.5  | 2360  | 1.57 | 3.1   |
| 45 | Remierzewo    | 94.7  | 141   | 5.3  | 5.7  | 24.9 | 4200 | 460  | 2330   | 10050 | 2.29 | 16.6  |
| 46 | Resko Górne   | 50.7  | 145   | 1.3  | 2.7  | 5    | 1610 | 1200 | 1405   | 7200  | 2.85 | 18.8  |
| 47 | Rydzewo       | 39.8  | 100   | 1.8  | 4.5  | 7.8  | 1365 | 460  | 912.5  | 4050  | 1.81 | 8.7   |
| 48 | Rzepowskie    | 38.9  | 128   | 1    | 2.6  | 5.2  | 1700 | 330  | 1015   | 4275  | 1.94 | 15    |
| 49 | Siecino       | 729   | 129   | 104  | 14.1 | 44.2 | 7445 | 2060 | 1752.5 | 24550 | 2.54 | 51    |
| 50 | Smolęsko      | 47.1  | 138.4 | 0.8  | 1    | 4    | 2250 | 375  | 1312.5 | 5300  | 2.18 | 26.2  |
| 51 | Spore         | 90    | 137   | 3    | 3.4  | 7.4  | 2925 | 525  | 1725   | 7150  | 2.13 | 26.5  |
| 52 | Staw          | 27.9  | 117   | 0.2  | 0.9  | 2.4  | 900  | 730  | 815    | 3350  | 1.2  | 31    |
| 53 | Stępieńskie   | 36.7  | 140   | 3.1  | 8.7  | 33.1 | 1500 | 400  | 950    | 3225  | 1.5  | 4.2   |
| 54 | Studnica      | 101.7 | 139   | 8.2  | 8.1  | 24.9 | 2225 | 775  | 1500   | 6425  | 1.8  | 12.6  |
| 55 | Trzebiechowo  | 89.2  | 137   | 3.1  | 3.5  | 8    | 2315 | 750  | 1532.5 | 6370  | 1.9  | 25.5  |
| 56 | Trzesiecko    | 295.1 | 134.4 | 16   | 5.4  | 11.8 | 5510 | 875  | 3192.5 | 15875 | 2.6  | 54.6  |
| 57 | Wielatowo     | 186.6 | 142   | 4.6  | 2.5  | 4.7  | 2325 | 1225 | 1775   | 8800  | 1.82 | 74.6  |
| 58 | Wielimie      | 1754  | 132   | 40.1 | 2.2  | 5.5  | 7000 | 4900 | 5950   | 37000 | 2.43 | 797.5 |
| 59 | Wielkie Dąbie | 49.8  | 124   | 4.5  | 9.1  | 29.2 | 1750 | 400  | 1075   | 4275  | 1.71 | 5.5   |
| 60 | Wierzchowo    | 731   | 139   | 70.2 | 9.6  | 26.5 | 5200 | 2250 | 3725   | 20505 | 2.14 | 76.1  |
| 61 | Wierzchówko   | 35.8  | 139   | 0.46 | 1.3  | 2.8  | 890  | 590  | 740    | 2900  | 1.36 | 27.5  |
| 62 | Wilczkowo     | 98.9  | 136   | 3.4  | 3.5  | 7.5  | 2600 | 720  | 1660   | 7250  | 2.06 | 28.3  |
| 63 | Wilczkowo     | 300.4 | 123   | 23.3 | 7.8  | 26.7 | 4120 | 1200 | 2660   | 12445 | 2.03 | 38.5  |
| 64 | Wilże         | 30.2  | 97.3  | 2    | 6.7  | 15.7 | 1230 | 400  | 815    | 3100  | 1.59 | 4.5   |
| 65 | Zarańskie     | 174   | 115   | 12.7 | 7.3  | 18.6 | 2600 | 1525 | 2062.5 | 10700 | 2.29 | 23.9  |
| 66 | Żabickie      | 65.3  | 72    | 1.2  | 1.9  | 4.6  | 1200 | 860  | 1030   | 3500  | 1.22 | 31.1  |
| 67 | Żerdno        | 205   | 128   | 31.2 | 15.2 | 36   | 3090 | 990  | 2040   | 7250  | 1.43 | 13.5  |
